# Supplementary material
Source: Springer Nature journal article supplement (https://www.springermedizin.de/resource/supplementary/12874_2009_421_MOESM3_ESM.pdf/9432058)

Observed vs Estimated

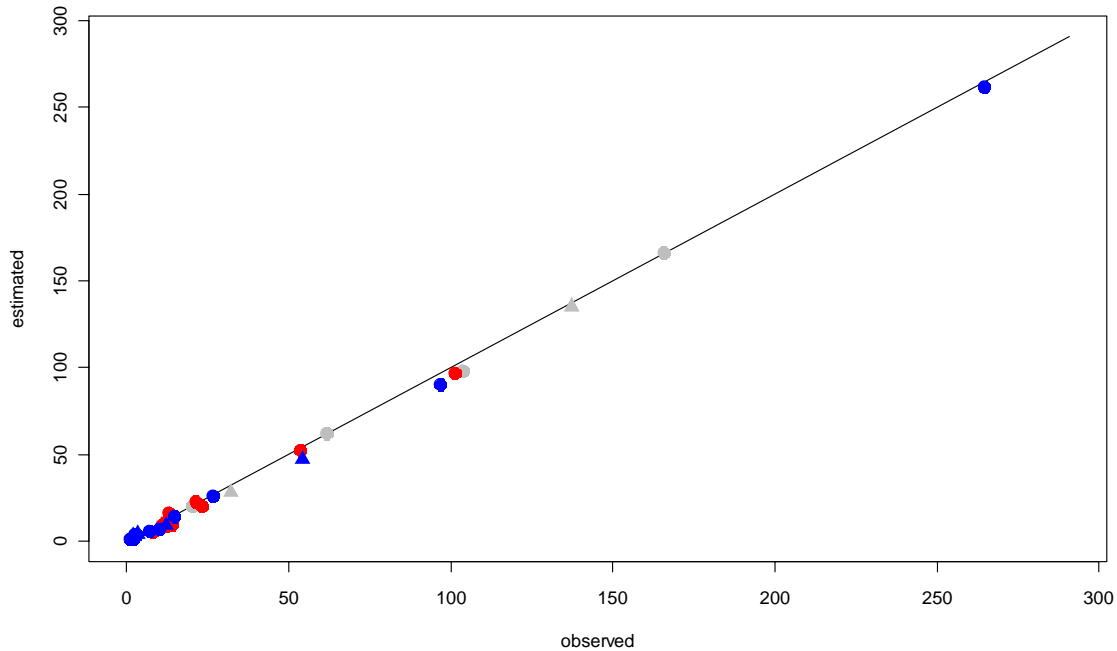

Supplement: MOESM3 [file 9432058]
